# Supplementary material for: Hepatitis B virus RNAs co-opt ELAVL1 for stabilization and CRM1-dependent nuclear export
Source: PubMed Central journal article supplement (PMC10866535; doi:10.1371/journal.ppat.1011999), 2024-02-02
Supplement: ppat.1011999.s009.pdf [file ppat.1011999.s009.pdf]

**S1 Table. Critical commercial kits**

| <b>Critical commercial kits</b>                      | <b>Source</b>                | <b>Identifier</b>  |
|------------------------------------------------------|------------------------------|--------------------|
| Ultrapure RNA Kit                                    | CWBIO                        | Cat #: CW0581      |
| ReverTra Ace qPCR RT Master Mix<br>with gDNA Remover | TOYOBO                       | Cat #: FSQ-301     |
| FastSmart Essential DNA Green<br>Master Mix          | ROCH                         | Cat #: 06924204001 |
| Nuclear and Cytoplasmic Extraction<br>Reagents Kit   | Beyotime                     | Cat #: P00028      |
| RNA Purification Kit                                 | SIMGEN                       | Cat #: 5401050     |
| T7 mScript Standard mRNA<br>Production System        | CELLSCRIPT                   | Cat #: C-MS11610   |
| RNA 3' End Desthiobiotinylation Kit                  | Thermo Scientific            | Cat #: 20163       |
| RNAScope Sample Preparation Kit                      | Advanced Cell<br>Diagnostics | Cat #: 322381      |
| RNAScope Multiplex Fluorescent<br>Detection Kit      | Advanced Cell<br>Diagnostics | Cat #: 323110      |
| RNAScope Probe V-HBV-GTD                             | Advanced Cell<br>Diagnostics | Cat #: 441351      |
| HBV DNA Diagnostic Kit                               | Sansure                      |                    |
| ELISA HBV Test Kit (HBeAg)                           | KHB                          |                    |
| ELISA HBV Test Kit (HBsAg)                           | KHB                          |                    |
| Dual-Luciferase Reporter Assay<br>System             | Promega                      | Cat #: E2940       |
