# Supplementary material for: Hepatitis B virus RNAs co-opt ELAVL1 for stabilization and CRM1-dependent nuclear export
Source: PubMed Central journal article supplement (PMC10866535; doi:10.1371/journal.ppat.1011999), 2024-02-02
Supplement: ppat.1011999.s010.pdf [file ppat.1011999.s010.pdf]

**S2 Table. Antibodies**

| <b>Antibodies</b>           | <b>Source</b>               | <b>Identifier</b> |
|-----------------------------|-----------------------------|-------------------|
| Rabbit anti-HBc             | Self-made                   | N/A               |
| Rabbit anti-HBs             | NOVUS Biology               | Cat #: NB10062652 |
| Rabbit anti-ELAVL1          | proteintech                 | Cat#:11910-1-AP   |
| Rabbit anti-CRM1            | ABclonal                    | Cat #: A19625     |
| Rabbit anti-DIS3            | Proteintech                 | Cat#:14689-1-AP   |
| Rabbit anti-NXF1            | Proteintech                 | Cat#:10328-1-AP   |
| Rabbit anti-ANP32A          | ABclonal                    | Cat#: A5768       |
| Rabbit anti-ANP33B          | Huaan Biotechnology         | Cat#: ET109-89    |
| Rabbit anti- $\beta$ -actin | ABclonal                    | Cat #: AC026      |
| Mouse anti-Myc              | BIOPRIMACY                  | Cat #: PMK112M    |
| Mouse anti-His              | BIOPRIMACY                  | Cat #: PMK0115    |
| Anti-rabbit IgG, HRP-linked | CellSignaling<br>Technology | Cat #: 7074       |
| Anti-mouse IgG, HRP-linked  | CellSignaling<br>Technology | Cat #: 7076       |
| Rabbit IgG                  | Proteintech                 | Cat #: B900610    |
| Mouse IgG                   | Proteintech                 | Cat #: B900620    |
