# Supplementary material for: Hepatitis B virus RNAs co-opt ELAVL1 for stabilization and CRM1-dependent nuclear export
Source: PubMed Central journal article supplement (PMC10866535; doi:10.1371/journal.ppat.1011999), 2024-02-02
Supplement: ppat.1011999.s011.pdf [file ppat.1011999.s011.pdf]

**S3 Table. Oligonucleotides**

| <b>Oligonucleotides</b>              | <b>Sequence</b>                                                       |
|--------------------------------------|-----------------------------------------------------------------------|
| <b>siELAVL1-1</b>                    | 5'-TACCAGTTTCAATGGTCATAA-3'                                           |
| <b>siELAVL1-2</b>                    | 5'-TTGTTAGTGTACAACCTCATT-3'                                           |
| <b>siCRM1-1</b>                      | 5'-GCTCAAGAAGTACTGACACAT-3'                                           |
| <b>siCRM1-2</b>                      | 5'-CCATTGTAAAGCGACTTCAAA-3'                                           |
| <b>siANP32A-1</b>                    | 5'-CCTATTGTGATTTGACTGTTT-3'                                           |
| <b>siANP32A-2</b>                    | 5'-CCTGAAGATGAGGGAGAAGAT-3'                                           |
| <b>siANP32B-1</b>                    | 5'-GCTTACCTACTTGGATGGCTA-3'                                           |
| <b>siANP32B-2</b>                    | 5'-CCACCCAAAGAGCCAAAGAAT-3'                                           |
| <b>siRRP4</b>                        | 5'-GAGAAGCTCATTGCATCTGTT-3'                                           |
| <b>siEXOSC4</b>                      | 5'-CGCTCCCAGATTGATATCTAT-3'                                           |
| <b>siDIS3</b>                        | 5'-CCCGAACTCATAGATCGTCTT-3'                                           |
| <b>siRRP6</b>                        | 5'-GCATGTCCTTTCCAACCTGGAA-3'                                          |
| <b>shELAVL1-1<br/>forward primer</b> | 5'-CCGGTACCAGTTTCAATGGTCATAACTCGAGT<br>TATGACCATTGAAACTGGTATTTTTG -3' |
| <b>shELAVL1-1<br/>reverse primer</b> | 5'-AATTCAAAAATACCAGTTTCAATGGTCATAAC<br>TCGAGTTATGACCATTGAAACTGGTA -3' |
| <b>shELAVL1-2</b>                    | 5'- CCGGTTGTTAGTGTACAACCTCATTCTCGAGAA                                 |

---

|                                       |                                                                         |
|---------------------------------------|-------------------------------------------------------------------------|
| <b>forward primer</b>                 | ATGAGTTGTACACTAACAATTTTGG -3'                                           |
| <b>shELAVL1-2</b>                     | 5'- AATTCAAAAATTGTTAGTGTACAACCTCATTCT                                   |
| <b>reverse primer</b>                 | CGAGAAATGAGTTGTACACTAACA -3'                                            |
| <b>sh<i>Elavl1</i> forward primer</b> | 5'-ACCCGAGGTTGAATCTGCAAAGCTCTCGAGAG<br>CTTTGCAGATTCAACCTCG-3'           |
| <b>sh<i>Elavl1</i> reverse primer</b> | 5'-AACCGAGGTTGAATCTGCAAAGCTCTCGAGAG<br>CTTTGCAGATTCAACCTCG-3'           |
| <b>shCRM1-1 forward primer</b>        | 5'-CCGGGCTCAAGAAGTACTGACACATCTCGAGA<br>TGTCAGTCAGTACTTCTTGAGCTTTTTTG-3' |
| <b>shCRM1-1 reverse primer</b>        | 5'-AATTCAAAAAGCTCAAGAAGIACIGACACATC<br>TCGAGATGTGTCAGATCTTCTTGAGCT-3'   |
| <b>shCRM1-2 forward primer</b>        | 5'-CCGGCCATTGTAAAGCGACTTCAAACCTCGAGT<br>TTGAAGTCGCTTTACAATGGTTTTTG-3'   |
| <b>shCRM1-2 reverse primer</b>        | 5'-AATTCAAAAACCATTGTAAAGCGACTTCAAAC<br>TCGAGTTTGAAGTCGCTTTACAATGG-3'    |
| <b>shDIS3-1 forward primer</b>        | 5'-CCGGCCCTGCCATCAGGAATGTAATCTCGAGAT<br>TACATTCCTGATGGCAGGGTTTTTG-3'    |
| <b>shDIS3-1 reverse primer</b>        | 5'-AATTCAAAAACCCTGCCATCAGGAATGTAATC<br>TCGAGATTACATTCCTGATGGCAGGG-3'    |

---

---

|                                |                                                                      |
|--------------------------------|----------------------------------------------------------------------|
| <b>shDIS3-2 forward primer</b> | 5'-CCGGCCCGAACTCATAGATCGTCTTCTCGAGA<br>AGACGATCTATGAGTTCGGGTTTTTG-3' |
| <b>shDIS3-2 reverse primer</b> | 5'-AATTCAAAAACCCGAACTCATAGATCGTCTTC<br>TCGAGAAGACGATCTATGAGTTCGGG-3' |
| <b>shNXF3-1 forward primer</b> | 5'-CCGGCCAGAGCAACTTTATGTGGTACTCGAGT<br>ACCACATAAAGTTGCTCTGGTTTTTG-3' |
| <b>shNXF3-1 reverse primer</b> | 5'-AATTCAAAAACCAGAGCAACTTTATGTGGTAC<br>TCGAGTACCACATAAAGTTGCTCTGG-3' |
| <b>shNXF3-2 forward primer</b> | 5'-CCGGACAAGCTCTTTGTGCGGGATACTCGAGT<br>ATCCCGCACAAAGAGCTTGTTTTTTG-3' |
| <b>shNXF3-2 reverse primer</b> | 5'-AATTCAAAAACAAGCTCTTTGTGCGGGATAC<br>TCGAGTATCCCGCACAAAGAGCTTGT-3'  |
| <b>shNXF1-1 forward primer</b> | 5'-CCGGCGCGAACGATTTCCCAAGTTACTCGAGT<br>AACTTGGGAAATCGTTCGCGTTTTTG-3' |
| <b>shNXF1-1 reverse primer</b> | 5'-AATTCAAAAACGCGAACGATTTCCCAAGTTAC<br>TCGAGTAACTTGGGAAATCGTTCGCG-3' |
| <b>shNXF1-2 forward primer</b> | 5'-CCGGTCAGAAGATTGAGCCTCACTGCTCGAGC<br>AGTGAGGCTCAATCTTCTGATTTTTG-3' |
| <b>shNXF1-2 reverse</b>        | 5'-AATTCAAAAATCAGAAGATTGAGCCTCACTGC                                  |

---

---

|                                 |                                                                      |
|---------------------------------|----------------------------------------------------------------------|
| <b>primer</b>                   | TCGAGCAGTGAGGCTCAATCTTCTGA-3'                                        |
| <b>shEIF4E-1 forward primer</b> | 5'-CCGGCGGCTGATCTCCAAGTTTGATCTCGAGA<br>TCAAACCTGGAGATCAGCCGTTTTTG-3' |
| <b>shEIF4E-1 reverse primer</b> | 5'-AATTCAAAAACGGCTGATCTCCAAGTTTGATC<br>TCGAGATCAAACCTGGAGATCAGCCG-3' |
| <b>shEIF4E-2 forward primer</b> | 5'-CCGGCCACTCTGTAATAGTTCAGTACTCGAGTA<br>CTGAACTATTACAGAGTGGTTTTTG-3' |
| <b>shEIF4E-2 reverse primer</b> | 5'-AATTCAAAAACCACTCTGTAATAGTTCAGTAC<br>TCGAGTACTGAACTATTACAGAGTGG-3' |
| <b>pgRNA forward primer</b>     | 5'-CTGGGTGGGTGTTAATTTGG-3'                                           |
| <b>pgRNA reverse primer</b>     | 5'-TAAGCTGGAGGAGTGCGAAT-3'                                           |
| <b>Total RNA forward primer</b> | 5'-CCGTCTGTGCCTTCTCATCTGC-3'                                         |
| <b>Total RNA reverse primer</b> | 5'-ACCAATTTATGCCTACAGCCTCC-3'                                        |
| <b>CRM1 forward primer</b>      | 5'-CTCCCTAATCAAGTGTGGGATAG-3'                                        |
| <b>CRM1 reverse primer</b>      | 5'-TGTTTCAGGATCTTTCAGTATATCCA-3'                                     |

---

---

**primer**

**ELAVL1 forward** 5'-CAGGCGCAGAGATTCAGG-3'

**primer**

**ELAVL1 reverse** 5'-GGTTGTAGATGAAAATGCACCA

**primer**

**RRP4 forward** 5'-TGGCTCGCAAGCCTCTTAG-3'

**primer**

**RRP4 reverse** 5'-TGTGTCCGTAGTGATTGTATCCC-3'

**primer**

**EXOSC4 forward** 5'-CTCTTGTCGGACCAGGGCTA-3'

**primer**

**EXOSC4 reverse** 5'-TGCCCTGCTCAATGTAGGC-3'

**primer**

**DIS3 forward** 5'-AGTCAGTGGGTAGCACCATCT-3'

**primer**

**DIS3 reverse** 5'-AGCATTCGTTCTGTCTTCTTC-3'

**primer**

**RRP6 forward** 5'-CGGATGATCAGCAACCGC-3'

**primer**

**RRP6 reverse** 5'-TAGCATTTTCTAGCGCGGC-3'

**primer**

**NXF3 forward** 5'-AGTGTGCACGACCTTCTCG-3'

---

---

**primer**

**NXF3 reverse** 5'-TGGGGAACAATTCCAGGAT-3'

**primer**

**EIF4E forward** 5'-TTTTGGGCTCTGTACAACCA-3'

**primer**

**EIF4E reverse** 5'-CCCACATAGGCTCAATACCATC-3'

**primer**

**HSP70 forward** 5'-AGGACATCAGCCAGAACAAG-3'

**primer**

**HSP70 reverse** 5'-GTAGAAGTCGATGCCCTCAA-3'

**primer**

**$\beta$ -actin forward** 5'-ATCGTGCGTGACATTAAGGAG-3'

**primer**

**$\beta$ -actin reverse** 5'-GGAAGGAAGGCTGGAAGAGT-3'

**primer**

**human snU2** 5'-ATGGATTTTTGGAGCAGGGAGA-3'

**forward primer**

**human snU2** 5'-GCACCGTTCCTGGAGGTACTG-3'

**reverse primer**

**human snU6** 5'-CTCGCTTCGGCAGCACA-3'

**forward primer**

**human snU6** 5'-AACGCTTCACGAATTTGCGT-3'

---

---

**reverse primer**

**mouse snU1**      5'-GGAGATACCATGATCACGAAGG-3'

**forward primer**

**mouse snU1**      5'-AGTCGAGTTTCCCGCATTT-3'

**reverse primer**

---
