# Supplementary material for: Hepatitis B virus RNAs co-opt ELAVL1 for stabilization and CRM1-dependent nuclear export
Source: PubMed Central journal article supplement (PMC10866535; doi:10.1371/journal.ppat.1011999), 2024-02-02
Supplement: ppat.1011999.s012.pdf [file ppat.1011999.s012.pdf]

**S4 Table. Chemicals**

| <b>Chemicals</b>      | <b>Source</b>  | <b>Identifier</b> |
|-----------------------|----------------|-------------------|
| Leptomycin B          | APEXBIO        | Cat #: B6907      |
| CMLD-2                | MedChemExpress | Cat #: HY-124828  |
| PEI MAX 40K           | Polysciences   | Cat #: 24765-1    |
| Lipofectamine RNAiMAX | Invitrogen     | Cat #: 13778075   |
